# Supplementary material for: A low-cost strategy to synthesize MnO nanorods anchored on 3D biomass-derived carbon with superior microwave absorption properties
Source: Royal Society of Chemistry journal article supplement (doi:10.1039/c9tc02182e), 2019-01-01
Supplement: c9tc02182e1.pdf [file c9tc02182e1.pdf]

# **A low-cost strategy to synthesis MnO nanorods anchored on 3D biomass derived carbon with superior microwave absorption properties**

**Peitao Hu<sup>1</sup>, Shun Dong<sup>1,\*</sup>, Xiutao Li<sup>2</sup>, Jingmao Chen<sup>1,2</sup>,  
Xinghong Zhang<sup>1</sup>, Ping Hu<sup>1,\*</sup>, Shengsen Zhang<sup>3</sup>**

<sup>1</sup>National Key Laboratory of Science and Technology for National Defence on Advanced Composites in Special Environments, Harbin Institute of Technology, Harbin 150001, PR China

<sup>2</sup>China Academy of Launch Vehicle Technology, Beijing 100076, PR China

<sup>3</sup>College of Materials and Energy, South China Agricultural University, Guangzhou 510463, PR China

***\*Corresponding author: Tel/fax: +86 451 86403016.***

**E-mail address: [dongshun@hit.edu.cn](mailto:dongshun@hit.edu.cn) (S. Dong); [Hupinghit88@163.com](mailto:Hupinghit88@163.com) (P. Hu)**

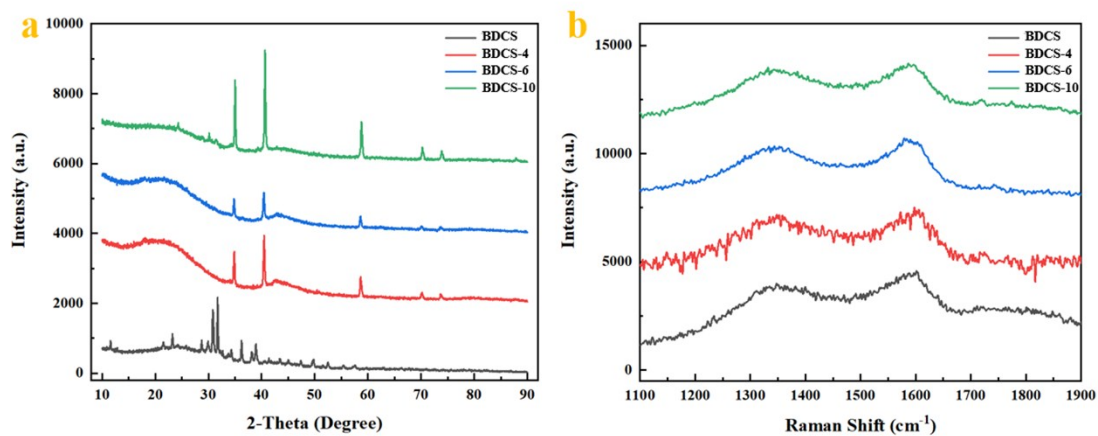

**Fig. S1** (a) XRD and (b) Raman spectra of BDC (donated as BDCS) and BDC/MnO NRs composites (donated as BDCS-4, BDCS-6 and BDCS-10).

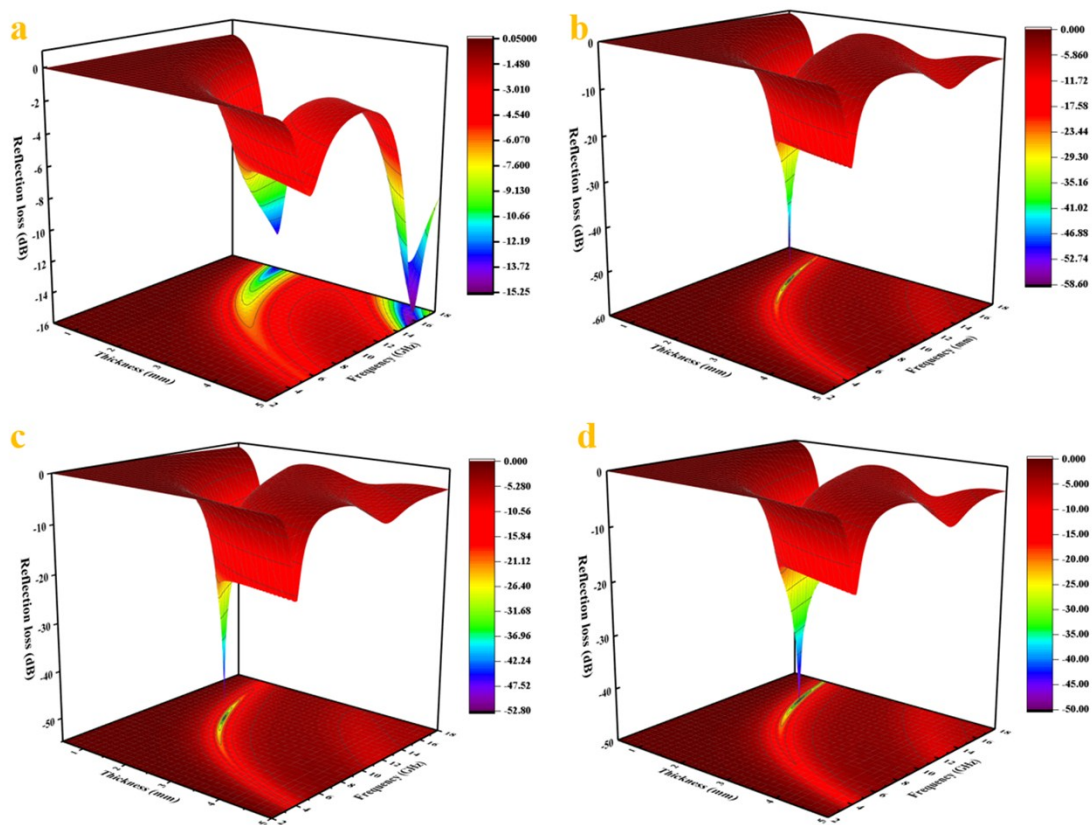

**Fig. S2** Three-dimensional graphs of  $RL$  values of BDC and BDC/MnO NRs composites (a) BDCS, (b) BDCS-4, (c) BDCS-6 and (d) BDCS-10.
